# Supplementary material for: Clinicians’ and laboratory medicine specialists’ views on laboratory demand management: a survey in nine European countries
Source: publisher site journal article supplement (doi:10.1515/dx-2019-0081), 2020-01-28
Supplement: Supplementary file 1 [file dx-2019-0081_suppl.docx]

Supplemental

Table1. Survey questions

| **Questions** |  | **Answer options** |
| --- | --- | --- |
| **Laboratory or clinician** |  |  |
| I am a... | Choose one of the following answers | Laboratory Specialist |
| Clinician / Clinical physician |
| None of the above |
| If the previous answer was “None of the above” the survey finishes here. | | |
| **Laboratory specialist survey** | | |
| **Laboratory specialist - General Information** | | |
| Age | Choose one of the following answers | <35 |
| 35-44 |
| 45-54 |
| 55-65 |
| >65 |
| What analytical department do you mainly work in? | Choose one of the following answers | Biochemistry |
| Immunochemistry |
| Hematology |
| Hemostasis/coagulation |
| Microbiology |
| Infectious diseases/Serology |
| Genetics |
| Preanalytics |
| Emergency / STAT lab |
| Quality management |
| Other: |
| Years of experience (not including training in laboratory medicine) | Choose one of the following answers | <5 |
| 5-10 |
| 11-20 |
| 21-30 |
| >30 |
| What is your role in the laboratory? | Choose one of the following answers | Director / Management |
| Quality manager |
| Area manager |
| Regular employee |
| Please state if you work in a: | Choose one of the following answers | Primary Care Laboratory |
| Hospital laboratory |
| Laboratory that serves both primary care and hospital (in- and outpatients) |
| Samples per day | Choose one of the following answers | We do not analyze patient samples (blood, urine, etc) |
| <500 / day |
| 500 - 3.000 / day |
| 3.001 - 10.000 / day |
| >10.000 / day |
| If the previous answer was “we do not analyze patient samples (blood, urine, etc)” the survey finishes here. | | |
| Please state the type of institution you work in | Choose one of the following answers | Privately owned (for-profit) laboratory |
| Public (non-profit) laboratory |
| In which country is your laboratory located? | Choose one of the following answers | Austria |
| Belgium |
| Denmarck |
| Ireland |
| Portugal |
| Russia |
| Serbia |
| Spain |
| United Kingdom |
| Other |
| **Laboratory specialist - Strategies used and its impact** |  |  |
| Does your institution use any of the following strategies for laboratory test demand management and test request rationalization (e.g. restricting test requests, design of request forms)? | Possible answers: Yes/No/I don’t Know | Provide published guidelines/diagnostic algorithms to clinicians |
| Develop own ordering protocols/profiles in collaboration with clinicians |
| Manage the demand using electronic order entry tools with/without an expert system |
| Delete selected tests from standard laboratory ordering forms |
| Define re-testing intervals (minimum period between 2 identical tests) |
| Give clinicians personal feedback about the number and cost of laboratory tests requested |
| Review appropriateness of selected test requests by a specialist in laboratory medicine |
| If there is any other strategy you use to manage laboratory requests, please comment here: |
| Do you think the following strategies could be effective to improve patient outcome? | Possible answers: Yes/No/I don’t Know | Provide published guidelines/diagnostic algorithms to clinicians |
| Develop own ordering protocols/profiles in collaboration with clinicians |
| Manage the demand using electronic order entry tools with/without an expert system |
| Delete selected tests from standard laboratory ordering forms |
| Define re-testing intervals (minimum period between 2 identical tests) |
| Give clinicians personal feedback about the number and cost of laboratory tests requested |
| Review appropriateness of selected test requests by a specialist in laboratory medicine |
| Do you think the following strategies could be effective to reduce health care costs? | Possible answers: Yes/No/I don’t Know | Provide published guidelines/diagnostic algorithms to clinicians |
| Develop own ordering protocols/profiles in collaboration with clinicians |
| Manage the demand using electronic order entry tools with/without an expert system |
| Delete selected tests from standard laboratory ordering forms |
| Define re-testing intervals (minimum period between 2 identical tests) |
| Give clinicians personal feedback about the number and cost of laboratory tests requested |
| Review appropriateness of selected test requests by a specialist in laboratory medicine |
| Do you know the costs of the tests (reagent) you mainly perform? | Choose one of the following answers | Yes, for some tests |
| Yes, for most tests |
| Yes, for all tests |
| No |
| Is this information (costs) important/relevant for you? | Choose one of the following answers | Yes |
| No |
| **Laboratory specialist – Laboratory role in demand management** | | |
| Do you have meetings, clinical sessions or other contacts with physicians where the use of laboratory tests is discussed at a local level? | Choose one of the following answers | Never |
| Once a year |
| Twice a year |
| Once a month |
| Regularly |
| How do you inform physicians about laboratory services (preanalytical instructions, new tests, test indications etc.)? | Check all that apply | Laboratory website |
| Printed manual with instructions |
| Regular Meetings with clinicians about demand management |
| E-mail |
| We do not provide such information |
| Other: |
| Do you think advice/information about the indication of the tests is useful? | Choose one of the following answers | Yes, but only about new tests |
| Yes, about any test |
| No |
| In what area / s of the laboratory do you think the advice/ information about demand management would be more useful? | Check all that apply | Preanalytics |
| Biochemistry |
| Hematology |
| Hemostasis / Coagulation |
| Infectious diseases / Serology |
| Allergy |
| Autoimmunity |
| Protein Diagnostics |
| Blood gas analysis |
| Microbiology |
| Genetic/Molecular tests |
| Therapeutic Drug Monitoring / Toxicology |
| Tumor markers |
| Other: |
| Do you participate in multidisciplinary groups with clinicians on adequacy of the demand for laboratory tests? | Choose one of the following answers | Yes |
| No |
| Currently not, but I would be willing to participate |
| There are no such groups in our health care setting |
| In your opinion, what influence/impact should the laboratory specialist have in the decision to introduce or eliminate tests from its portfolio? |  | Rate from 0 to 5 - 0 = no influence/impact; 5 = highest possible influence/impact |
| In your opinion, what influence/impact should the clinician/clinical physician have in the decision to introduce or eliminate tests from the laboratory portfolio? |  | Rate from 0 to 5 - 0 = no influence/impact; 5 = highest possible influence/impact |
| In your opinion, what influence/impact should the health care management have in the decision to introduce or eliminate tests from its portfolio? |  | Rate from 0 to 5 - 0 = no influence/impact; 5 = highest possible influence/impact |
| **Laboratory specialist - Interest** |  |  |
| Would you be interested to attend meeting or e-learning activities about laboratory test demand management? | Choose one of the following answers | Yes |
| No |
| Would you be interested in a benchmarking program regarding laboratory test demand? | Choose one of the following answers | Yes |
| No |
| **Clinicians survey** | | |
| **Clinician - General Information** |  |  |
| Age | Choose one of the following answers | <35 |
| 35-44 |
| 45-54 |
| 55-65 |
| >65 |
| What medical specialty do you mainly work in | Choose one of the following answers | Family medicine / General practitioner |
| Internal medicine |
| Endocrinology |
| Neurology |
| Hematology |
| Digestive medicine |
| Oncology |
| Nephrology |
| Urology |
| Cardiology |
| Gynecology |
| Allergy / Autoimmun diseases |
| Anesthesiology |
| Other: |
| Years of experience (not including training in laboratory medicine) | Choose one of the following answers | <5 |
| 5-10 |
| 11-20 |
| 21-30 |
| >30 |
| Please state if you work in a: | Choose one of the following answers | Primary care facility |
| Hospital |
| Other: |
| Please specify the number of beds, your hospital is serving | Choose one of the following answers | <500 |
| 500-1.000 |
| 1001-2000 |
| >2000 |
| Please state the type of institution you work in | Choose one of the following answers | Privately owned (for-pro_t) health care facility |
| Public (non-profit) health care facility |
| In which country are you located? | Choose one of the following answers | Austria |
| Belgium |
| Denmarck |
| Ireland |
| Portugal |
| Rusia |
| Serbia |
| Spain |
| United Kingdom |
| Other |
| **Clinician – Information/Communication** | | |
| Do you have communication with laboratory specialists? | Choose one of the following answers | Never |
| Once a year |
| Twice a year |
| Once a month |
| Regularly |
| How do you communicate with laboratory specialists? | Check all that apply | Directly / In person |
| By phone |
| By E-Mail (or other written communication) |
| How do you receive information about laboratory services? | Check all that apply | Through a website |
| From our lab ordering system (electronic or sheets) |
| From our written guidelines |
| Directly (e.g. orally) |
| From other colleagues |
| I don't receive any information about laboratory services |
| Other: |
| Does the laboratory usually offer advice/information about the indication of the tests? | Choose one of the following answers | Yes |
| No |
| I don’t know |
| Would you be interested in any advice/information about the indication of laboratory tests? | Choose one of the following answers | Yes, but only on new tests |
| Yes, on all tests |
| NO |
| In which area(s) of the laboratory do you think the advice/ information would be more useful? | Check all that apply | Preanalytics |
| Biochemistry |
| Hematology |
| Hemostasis / Coagulation |
| Infectious diseases / Serology |
| Allergy |
| Autoimmunity |
| Protein Diagnostics |
| Blood gas analysis |
| Microbiology |
| Genetic/Molecular tests |
| Therapeutic Drug Monitoring / Toxicology |
| Tumor markers |
| Other: |
| **Clinician – Demand Management** | | |
| In your opinion, are measures to ensure the appropriate use of laboratory tests (test demand management and test rationalization) necessary? | Choose one of the following answers | Yes |
| No |
| I don’t know |
| In your opinion, what type of measures to ensure the appropriate use of laboratory tests could be useful? | Possible answers: Yes/No/I don’t Know | Provide published guidelines/diagnostic algorithms to clinicians |
| Develop own ordering protocols/profiles in collaboration with clinicians |
| Manage the demand using electronic order entry tools with/without an expert system |
| Delete selected tests from standard laboratory ordering forms |
| Define re-testing intervals (minimum period between 2 identical tests) |
| Give clinicians personal feedback about the number and cost of laboratory tests requested |
| Review appropriateness of selected test requests by a specialist in laboratory medicine |
| If there is any other strategy you use to manage laboratory requests, please comment here: |
| Do you believe improving the adequacy of laboratory tests demand would improve patient safety? | Choose one of the following answers | Yes |
| No |
| I don’t know |
| Do you know the price of the laboratory tests you request? | Choose one of the following answers | Yes, for some tests |
| Yes, for most tests |
| Yes, for all tests |
| No |
| Is this information (costs) important/relevant for you? | Choose one of the following answers | Yes |
| No |
| Would you welcome the laboratory specialists modifying your test order based on clinical and analytical information? | Choose one of the following answers | Yes |
| No |
| Is there any legal restriction in your country for the modification of the requested tests by laboratory specialists? |  | Yes |
| No |
| I don’t know |
| Depends on the situation ("It´s complicated") |
| Do you participate in multidisciplinary groups with laboratory specialists on adequacy of the demand for laboratory tests at a local level? | Choose one of the following answers | Yes |
| No |
| Currently not, but I would be willing to participate |
| There are no such groups in our health care setting |
| **Clinician – Role and Interest** | | |
| In your opinion, what influence/impact should the laboratory specialist have in the decision to introduce or eliminate tests from its portfolio? |  | Rate from 0 to 5 - 0 = no influence/impact; 5 = highest possible influence/impact |
| In your opinion, what influence/impact should the clinician/clinical physician have in the decision to introduce or eliminate tests from the laboratory portfolio? |  | Rate from 0 to 5 - 0 = no influence/impact; 5 = highest possible influence/impact |
| In your opinion, what influence/impact should the health care management have in the decision to introduce or eliminate tests from its portfolio? |  | Rate from 0 to 5 - 0 = no influence/impact; 5 = highest possible influence/impact |
| Would you be interested to attend meeting or e-learning activities about laboratory test demand management? |  | Yes |
| No |
